# Supplementary material for: In silico screening by AlphaFold2 program revealed the potential binding partners of nuage-localizing proteins and piRNA-related proteins
Source: eLife. 2025 Apr 22;13:RP101967. doi: 10.7554/eLife.101967 (PMC12014135; doi:10.7554/eLife.101967)
Supplement: Supplementary file 8. [file elife-101967-supp8.xlsx]

## Sheet: Sheet1
Gene	Oliigo_name	Oligo_sequence
BoYb	pENTR-ATG-BoYb-Fw	5’-GCCGCCCCCTTCACCATGATAAAAATTAGCGATGAAAAGACCTGGC
	pENTR-stop-BoYb-Rv	5’-GGCGCGCCCACCCTTTTATAAGTCCCATATTTTATGGCAGTCTGGAC
Me31B	pENTR-ATG-me31B-Fw	5’-GCCGCCCCCTTCACCATGATGACTGAAAAGTTAAATTCTGGGCA
	pENTR-stop-me31B-Rv	5’-GGCGCGCCCACCCTTTTATTTGCTAACGTTGCCCTCCTCG
Vret	pENTR-ATG-vret-Fw	5’-GCCGCCCCCTTCACCATGGAATCCGAATCCTCGCAGG
	pENTR-stop-vret-Rv	5’-GGCGCGCCCACCCTTTTAGTCCAAACTTAAGAACTCCTGCAGTT
Shu	pENTR-ATG-shu-Fw	5’-GCCGCCCCCTTCACCATGGAAGAAAACTTCGAACCGTACACC
	pENTR-stop-shu-Rv	5’-GGCGCGCCCACCCTTTCAAGCGAACTTAACATCCGGCT
Mei-W68	pENTR-ATG-meiW68 -Fw	5’-GCCGCCCCCTTCACCATGGATGAATTTTCGGAGAATATAGAAAGAATTG
	pENTR-stop-meiW68 -Rv	5’-GGCGCGCCCACCCTTCTACAAAAACAAGTTCCGATTGATTTTATTTGG
CSN3	pENTR-ATG-CSN3 -Fw	5’-GCCGCCCCCTTCACCATGGGCAGCGCGCTGGAAA
	pENTR-stop-CSN3 -Rv	5’-GGCGCGCCCACCCTTTCAATCTGTGGGATCACCCGAG
Pka-C1	pENTR-ATG-Pka-C1 -Fw	5’-GCCGCCCCCTTCACCATGGGCAACAACGCCACC
	pENTR-stop-Pka-C1 -Rv	5’-GGCGCGCCCACCCTTCTAGAATTCAGCAAACTCCTTGGCA
Vps25	pENTR-ATG-Vps25 -Fw	5’-GCCGCCCCCTTCACCATGGCGGAGTTCCAGTGGC
	pENTR-stop-Vps25 -Rv	5’-GGCGCGCCCACCCTTTTAGAAGAACTTAACGCCGTGGCT
Nup44A	pENTR-ATG-Nup44A-Fw	5’-GCCGCCCCCTTCACCATGTTCGACGTGGAACCCATTATTG
	pENTR-stop-Nup44A-Rv	5’-GGCGCGCCCACCCTTTCAGTGCCACGGCACCTGG
Nclb	pENTR-ATG-nclb -Fw	5’-GCCGCCCCCTTCACCATGGCTGAGGAAGGACCACC
	pENTR-stop-nclb -Rv	5’-GGCGCGCCCACCCTTCTACTCTGCATCAGGGATTCCAAAC
Spn-D	pENTR-ATG-spn-D -Fw	5’-GCCGCCCCCTTCACCATGAATCATAGATTTGTTCGGGTTTGGG
	pENTR-stop-spn-D -Rv	5’-GGCGCGCCCACCCTTTCATTCGGATTCCTTAATTAATCTACTCGTTC
Jagn	pENTR-ATG-jagn -Fw	5’-GCCGCCCCCTTCACCATGGCAACGCGCGGCGGA
	pENTR-stop-jagn -Rv	5’-GGCGCGCCCACCCTTTTACTGGAACTTGCGCGTGG
Rab7	pENTR-ATG-Rab7 -Fw	5’-GCCGCCCCCTTCACCATGTCCGGACGTAAGAAATCCCTAC
	pENTR-stop-Rab7 -Rv	5’-GGCGCGCCCACCCTTTTAGCACTGACAGTTGTCAGGATTG
Baf	pENTR-ATG-baf -Fw	5’-GCCGCCCCCTTCACCATGTCGGGCACATCGCAGA
	pENTR-stop-baf -Rv	5’-GGCGCGCCCACCCTTTTACAAGAACTCCTCGCACCAATC
Mats	pENTR-ATG-mats -Fw	5’-GCCGCCCCCTTCACCATGGACTTCTTGTTCGGTTCCCG
	pENTR-stop-mats -Rv	5’-GGCGCGCCCACCCTTCTATATCTGCCGCTCATCCTTAGCC
Abo	pENTR-ATG-abo -Fw	5’-GCCGCCCCCTTCACCATGGCCTACAAGAAGCGCCTA
	pENTR-stop-abo -Rv	5’-GGCGCGCCCACCCTTCTACTTTTCCACTATTGTGCTGTGG
Rab11	pENTR-ATG-Rab11 -Fw	5’-GCCGCCCCCTTCACCATGGGTGCAAGAGAAGACGAGT
	pENTR-stop-Rab11 -Rv	5’-GGCGCGCCCACCCTTTCACTGACAGCACTGTTTGCG
Vls	pENTR-ATG-vls -Fw	5’-GCCGCCCCCTTCACCATGTTCCCGCAACGCAGC
	pENTR-stop-vls -Rv	5’-GGCGCGCCCACCCTTTTATTTGATAGCGTGCGTCACCATT
Hsc70-4	pENTR-ATG-Hsc70-4 -Fw	5’-GCCGCCCCCTTCACCATGTCTAAAGCTCCTGCTGTTGG
	pENTR-stop-Hsc70-4 -Rv	5’-GGCGCGCCCACCCTTTTAGTCGACCTCCTCGATGGTGG
Piwi	pENTR-ATG-piwi -Fw	5’-GCCGCCCCCTTCACCATGGCTGATGATCAGGGACGTG
	pENTR-stop-piwi -Rv	5’-GGCGCGCCCACCCTTTTATAGATAATAAAACTTCTTTTCGAGCGCG
Twf	pENTR-ATG-twf -Fw	5’-GCCGCCCCCTTCACCATGTCTCACCAAACGGGTATCCG
	pENTR-stop-twf -Rv	5’-GGCGCGCCCACCCTTTTAGTCCTCTGCGGTGGGAC
Brn	pENTR-ATG-brn -Fw	5’-GCCGCCCCCTTCACCATGCAAAGTAAACACCGCAAACTG
	pENTR-stop-brn -Rv	5’-GGCGCGCCCACCCTTCTACGCGTAATTGGCGGATCG
